# Supplementary material
Source: PubMed Central journal article supplement (PMC3025713)
Supplement: supp_btq593_GRS-SupplementalMethods_Resub.pdf [file supp_btq593_GRS-SupplementalMethods_Resub.pdf]

## Concordant Measure $E$ and a Test Statistic

$$E = \frac{1}{2} \left\{ \frac{\sum p_{1j}s_{2j}}{\sum p_{1j}} + \frac{\sum p_{2j}s_{1j}}{\sum p_{2j}} \right\}$$

### Population parameters and estimates

We postulate that  $(p_{1j}, s_{1j})$ , for  $j = 1, \dots, n$  is a random sample from a "population 1" with mean  $(\mu_{p_1}, \mu_{s_1})$ , variances  $\sigma_{p_1}^2, \sigma_{s_1}^2$ , and covariance  $\gamma_1$ . Similarly, we assume  $(p_{2j}, s_{2j})$  are from "population 2" with mean  $(\mu_{p_2}, \mu_{s_2})$ , variances  $\sigma_{p_2}^2, \sigma_{s_2}^2$ , and covariance  $\gamma_2$ .

We can estimate the parameters of the populations using the sample data as follows. For  $i = 1, 2$

$$\begin{aligned} \hat{\mu}_{p_i} &= \bar{p}_i = \sum_j p_{ij}/n, & \hat{\mu}_{s_i} &= \sum_j s_{ij}/n, \\ \hat{\sigma}_{p_i}^2 &= \sum_j (p_{ij} - \bar{p}_i)^2/(n-1), & \hat{\sigma}_{s_i}^2 &= \sum_j (s_{ij} - \bar{s}_i)^2/(n-1) \\ \hat{\gamma}_i &= \sum_j (p_{ij} - \bar{p}_i)(s_{ij} - \bar{s}_i)/(n-1) \end{aligned} \quad (1)$$

### Null Hypothesis of No Concordance and the Null Distribution of $E$

We want (estimates for) the mean and variance of  $E$  under the null hypothesis of *no concordance* between the two samples.

We assume that the null hypothesis of *no concordance* is equivalent to the condition that  $(p_{1i}, s_{1i})$ 's are independent of  $(p_{2i}, s_{2i})$ 's.

Under the null hypothesis,  $E$  is approximately normally distributed, i.e.,

$$E \sim N(\mu_E, \sigma_E^2/n) \quad (2)$$

where  $\mu_E, \sigma_E^2$  are given in terms of the parameters  $\mu_{p_1}, \mu_{s_1}, \sigma_{p_1}^2, \sigma_{s_1}^2, \mu_{p_2}, \mu_{s_2}, \sigma_{p_2}^2, \sigma_{s_2}^2, \gamma_1$  and

$\gamma_2$ , as follows:

$$\mu_E = (\mu_{s_1} + \mu_{s_2})/2 \tag{3}$$

$$\sigma_E^2 = \boldsymbol{\delta}'\boldsymbol{\Sigma}\boldsymbol{\delta},$$

where

$$\boldsymbol{\delta} = 0.5 \cdot (1/\mu_{p_1}, -\mu_{s_2}/\mu_{p_1}, 1/\mu_{p_2}, -\mu_{s_1}/\mu_{p_2})', \tag{4}$$

and  $\boldsymbol{\Sigma}$  is a symmetric matrix whose elements (on and above the diagonal) are given below

$$\boldsymbol{\Sigma} = \begin{pmatrix} \sigma_{p_1}^2 \sigma_{s_2}^2 + \sigma_{p_1}^2 \mu_{s_2}^2 + \sigma_{s_2}^2 \mu_{p_1}^2 & \mu_{s_2} \sigma_{p_1}^2 & \gamma_1 \gamma_2 + \gamma_1 \mu_{p_2} \mu_{s_2} + \gamma_2 \mu_{p_1} \mu_{s_1} & \gamma_2 \mu_{p_1} \\ & \sigma_{p_1}^2 & \gamma_1 \mu_{p_2} & 0 \\ & & \sigma_{p_2}^2 \sigma_{s_1}^2 + \sigma_{p_2}^2 \mu_{s_1}^2 + \sigma_{s_1}^2 \mu_{p_2}^2 & \mu_{s_1} \sigma_{p_2}^2 \\ & & & \sigma_{p_2}^2 \end{pmatrix}$$

### Test statistic

Estimates of  $\mu_E$ ,  $\sigma_E^2$ , namely,  $\hat{\mu}_E$ ,  $\hat{\sigma}_E^2$ , can be obtained by substituting the estimates in (1) for the parameters in the expression for  $\mu_E$ ,  $\sigma_E^2$ , given in (3).

By (2), a test statistic for testing the null hypothesis of no concordance is a  $z$ -test statistic, given by

$$z = \sqrt{n} \left( \frac{E - \hat{\mu}_E}{\hat{\sigma}_E} \right)$$

### Details of the Derivation

$$\begin{aligned}
E &= \frac{1}{2} \left\{ \frac{\sum p_{1j} s_{2j}}{\sum p_{1j}} + \frac{\sum p_{2j} s_{1j}}{\sum p_{2j}} \right\} \\
&= \frac{1}{2} \left\{ \frac{\sum p_{1j} s_{2j}/n}{\sum p_{1j}/n} + \frac{\sum p_{2j} s_{1j}/n}{\sum p_{2j}/n} \right\} \\
&= \frac{1}{2} \{ \bar{X}_1/\bar{X}_2 + \bar{X}_3/\bar{X}_4 \},
\end{aligned}$$

where  $X_{1j} = p_{1j}s_{2j}$ ,  $X_{2i} = p_{1j}$ ,  $X_{3j} = p_{2j}s_{1j}$ , and  $X_{4j} = p_{2j}$ .

In the following we assume the null hypothesis is true.

By CLT,

$$\sqrt{n}(\bar{\mathbf{X}} - \boldsymbol{\mu}) \stackrel{approx.}{\sim} N(0, \Sigma)$$

where  $\mathbf{X} = (X_1, X_2, X_3, X_4)'$ , and  $\boldsymbol{\mu}$  and  $\Sigma = (\sigma_{ij})$  are the mean and variance of  $\mathbf{X}$ , given by

$$\boldsymbol{\mu} = (\mu_{p_1}\mu_{s_2}, \mu_{p_1}, \mu_{p_2}\mu_{s_1}, \mu_{p_2})$$

and  $\Sigma$  is a symmetric matrix given by

$$\Sigma = \begin{pmatrix} \sigma_{p_1}^2 \sigma_{s_2}^2 + \sigma_{p_1}^2 \mu_{s_2}^2 + \sigma_{s_2}^2 \mu_{p_1}^2 & \mu_{s_2} \sigma_{p_1}^2 & \gamma_1 \gamma_2 + \gamma_1 \mu_{p_2} \mu_{s_2} + \gamma_2 \mu_{p_1} \mu_{s_1} & \gamma_2 \mu_{p_1} \\ & \sigma_{p_1}^2 & \gamma_1 \mu_{p_2} & 0 \\ & & \sigma_{p_2}^2 \sigma_{s_1}^2 + \sigma_{p_2}^2 \mu_{s_1}^2 + \sigma_{s_1}^2 \mu_{p_2}^2 & \mu_{s_1} \sigma_{p_2}^2 \\ & & & \sigma_{p_2}^2 \end{pmatrix}$$

For convenience, we will use the notation  $\boldsymbol{\mu} = (\mu_1, \mu_2, \mu_3, \mu_4)'$  and  $\Sigma = (\sigma_{ij})$  to refer to the components of  $\boldsymbol{\mu}$  and  $\Sigma$ .

Now,

$$E = g(\bar{\mathbf{X}})$$

where  $g(\mathbf{x}) = g(x_1, x_2, x_3, x_4) = (x_1/x_2 + x_3/x_4)/2$ .

By Delta method,

$$E \stackrel{approx.}{\sim} N(\mu_E, \sigma_E^2/n)$$

where

$$\begin{aligned}\mu_E &= g(\boldsymbol{\mu}) = (\mu_{s_1} + \mu_{s_2})/2 \\ \sigma_E^2 &= \boldsymbol{\delta}'\Sigma\boldsymbol{\delta},\end{aligned}$$

and

$$\begin{aligned}\boldsymbol{\delta} &= \frac{\partial g(\mathbf{x})}{\partial \mathbf{x}} \text{ evaluated at } \mathbf{x} = \boldsymbol{\mu} \\ &= 0.5 \cdot (1/\mu_{p_1}, -\mu_{s_2}/\mu_{p_1}, 1/\mu_{p_2}, -\mu_{s_1}/\mu_{p_2})'\end{aligned}$$

### Expression $\boldsymbol{\mu}$ and $\Sigma$ in terms of the population parameters

$$\mu_1 = E(X_1) = E(p_1 s_2) = E(p_1)E(s_2) = \mu_{p_1}\mu_{s_2}$$

$$\mu_2 = \mu_{p_1}, \quad \mu_3 = E(p_2 s_1) = \mu_{p_2}\mu_{s_1}, \quad \mu_4 = \mu_{p_2}$$

$$\begin{aligned}\sigma_{11} &= \text{var}(X_1) = \text{var}(p_1 s_2) = E(p_1^2 s_2^2) - E(p_1)^2 E(s_2)^2 \\ &= E(p_1^2)E(s_2^2) - E(p_1^2)E(s_2)^2 + E(p_1^2)E(s_2)^2 - E(p_1)^2 E(s_2)^2 \\ &= E(p_1^2)V(s_2) + V(p_1)E(s_2^2) \\ &= V(p_1)[V(s_2) + E(s_2)^2] + V(s_2)E(p_1)^2 \\ &= \sigma_{p_1}^2 \sigma_{s_2}^2 + \sigma_{p_1}^2 \mu_{s_2}^2 + \sigma_{s_2}^2 \mu_{p_1}^2\end{aligned}$$

$$\sigma_{12} = \text{Cov}(X_1, X_2) = \text{cov}(p_1 s_2, p_1) = \mu_{s_2} \sigma_{p_1}^2$$

$$\sigma_{13} = \text{Cov}(p_1 s_2, p_2 s_1) = \gamma_1 \gamma_2 + \gamma_1 \mu_{p_2} \mu_{s_2} + \gamma_2 \mu_{p_1} \mu_{s_1}$$

$$\sigma_{14} = \text{Cov}(p_1 s_2, p_2) = \gamma_2 \mu_{p_1}$$

$$\sigma_{22} = \sigma_{p_1}^2$$

$$\sigma_{23} = \gamma_1 \mu_{p_2}$$

$$\sigma_{24} = \text{Cov}(p_1, p_2) = 0$$

$$\sigma_{33} = \text{var}(X_3) = \text{var}(p_2 s_1) = \sigma_{p_2}^2 \sigma_{s_1}^2 + \sigma_{p_2}^2 \mu_{s_1}^2 + \sigma_{s_1}^2 \mu_{p_2}^2$$

$$\sigma_{34} = \text{Cov}(p_2 s_1, p_2) = \mu_{s_1} \sigma_{p_2}^2$$

$$\sigma_{44} = \sigma_{p_2}^2$$
